# Supplementary material for: Conformation Selection by ATP-competitive Inhibitors and Allosteric Communication in ERK2
Source: PubMed Central journal article supplement (PMC10515847; doi:10.1101/2023.09.12.557258), 2023-09-12
Supplement: media-1.pdf [file media-1.pdf]

## **SUPPLEMENTAL MATERIALS**

**Anderson et al., “Conformation Selection by ATP-competitive Inhibitors and Allosteric Communication in ERK2”**

### **SUPPLEMENTAL FIGURES**

- Figure S1. Structural features of ERK2.
- Figure S2. Proteolytic peptides analyzed by HDX-MS
- Figure S3. Structural map of regions showing HDX responses to inhibitor binding.
- Figure S4. HDX time courses of regions with comparable responses to different inhibitors.
- Figure S5. HDX time courses of differential responses to inhibitor binding.
- Figure S6. Differential HDX responses to new inhibitors surveyed in this study.
- Figure S7. Chemical shift changes induced by inhibitor binding to 2P-ERK2.
- Figure S8. HDX time courses responsive to ATG017 binding.
- Figure S9. Interactions of L16 and helix  $\alpha$ L16 with N-lobe elements.
- Figure S10. Crystal contacts with the activation loop in X-ray structures of ERK2

### **SUPPLEMENTAL TABLE**

- Table S1. X-ray data collection and refinement parameters

### **SUPPLEMENTAL DATAFILES**

- Datafile S1. Deuterium uptake time courses for all HDX-MS experiments (Excel format)
- Datafile S2. NMR chemical shifts and perturbations by selected inhibitors (Excel format)
- Datafile S3. X-ray coordinates for 2PERK2\_Inhibitor#8 (PDB format)
- Datafile S4. X-ray coordinates for 2PERK2\_Inhibitor#16 (PDB format)

**Figure S1**

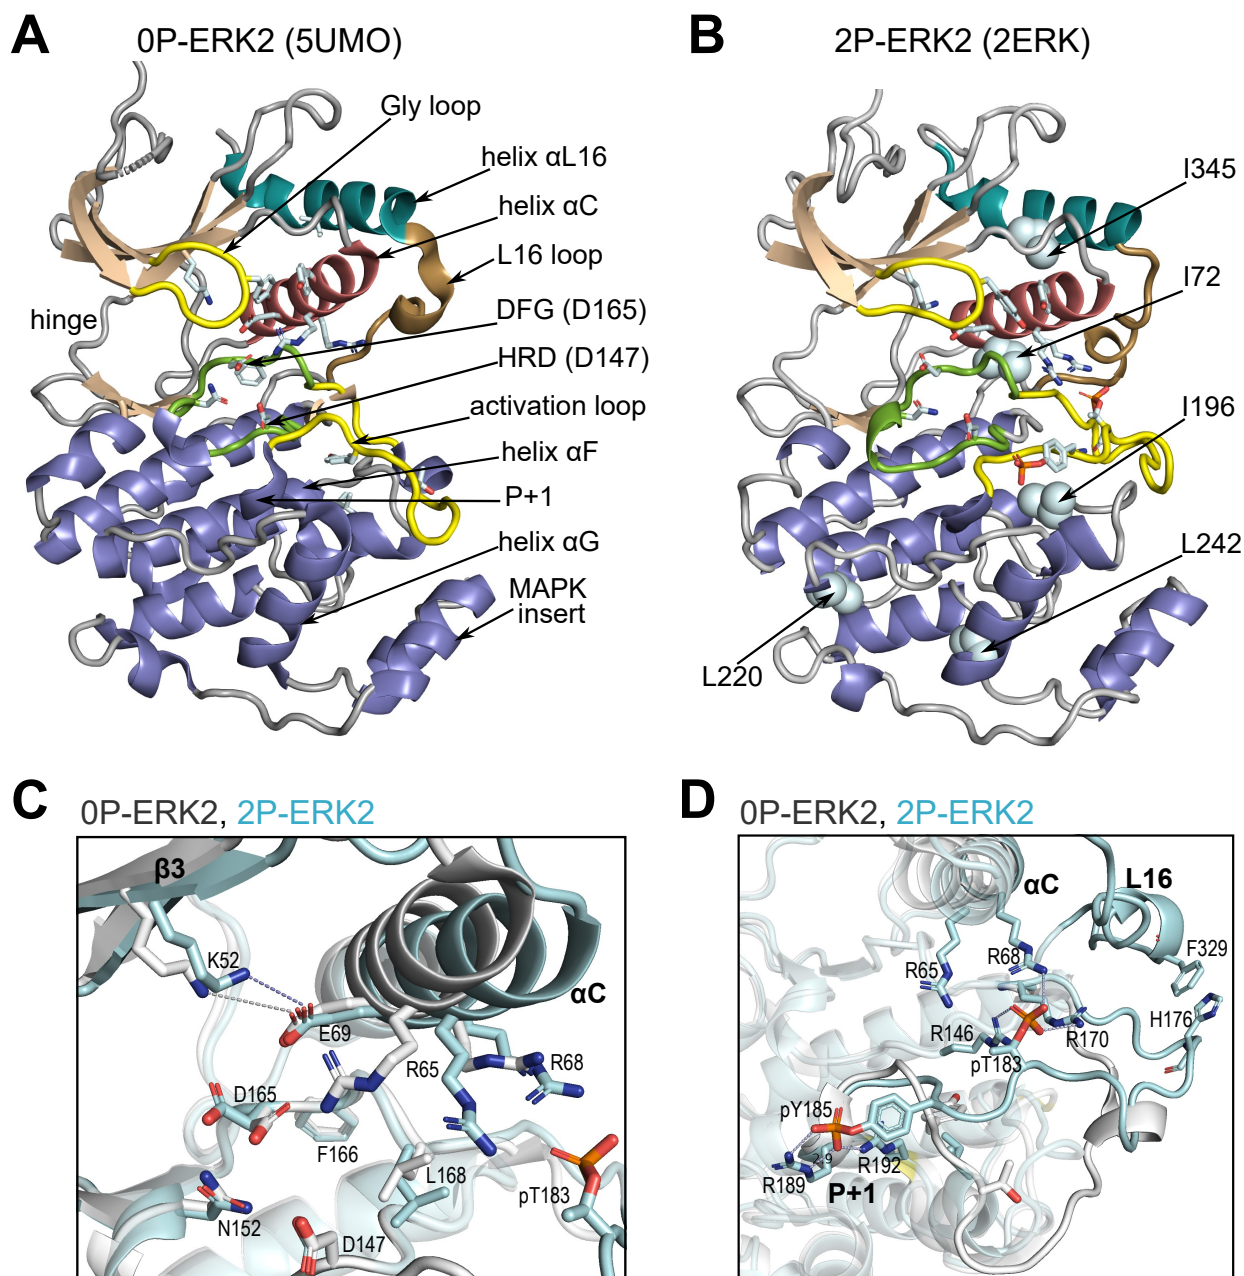

**Figure S1. Structural features of ERK2.** (A,B) X-ray structures of (A) 0P-ERK2 (PDBID:5UMO) and (B) 2P-ERK2 (PDBID:2ERK) apoenzymes. Panel A labels conserved motifs in ERK2 common to protein kinases. Panel B labels residues that illustrate L $\rightleftharpoons$ R exchange (I72, L220, L242; Figs. 1 and 6), and key chemical shift perturbations (I196, I345; Fig. 7). (C) Structural superposition of 0P-ERK2 (white) and 2P-ERK2 (pale blue), illustrating overlapping positions of active site residues and an outward shift of helix  $\alpha$ C upon dual phosphorylation. (D) Superposition of 0P-ERK2 and 2P-ERK2, illustrating conformational differences in the activation loop. In 2P-ERK2, pT183 and pY185 form ion pairs with multiple Arg residues, while the L16 loop folds into a 3/10 helix with side chain interactions to the activation loop. Structures were superpositioned by aligning C $\alpha$  atoms within the C-terminal domain (residues 109-141, 205-245, 272-310).

Figure S2

### A 0P-ERK2

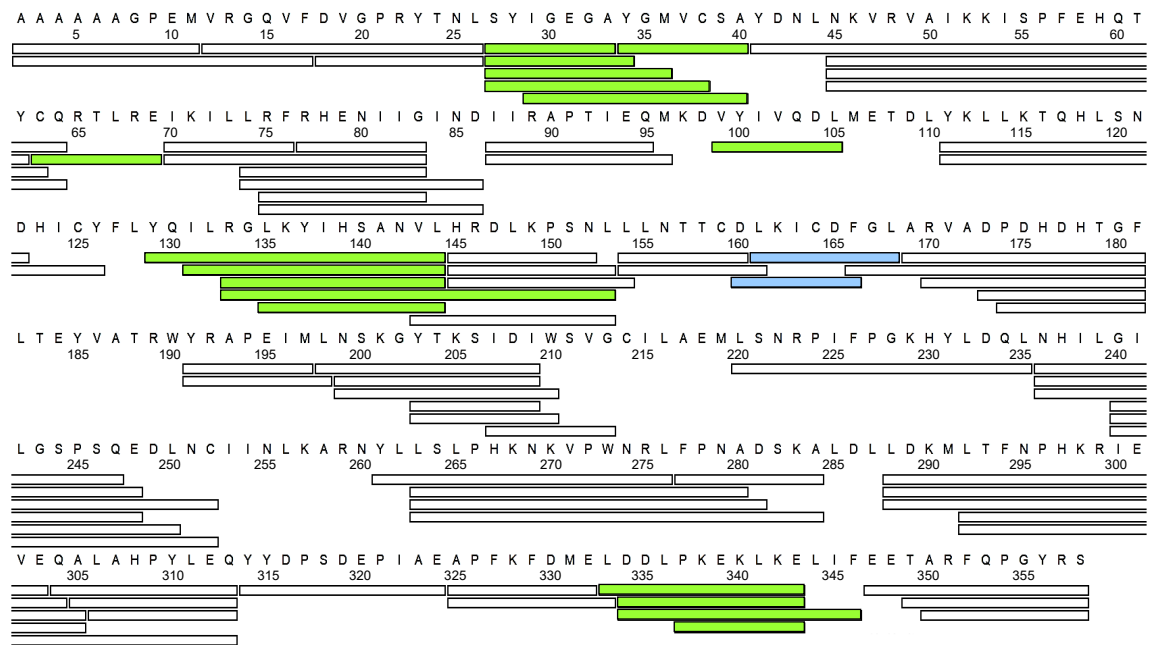

### B 2P-ERK2

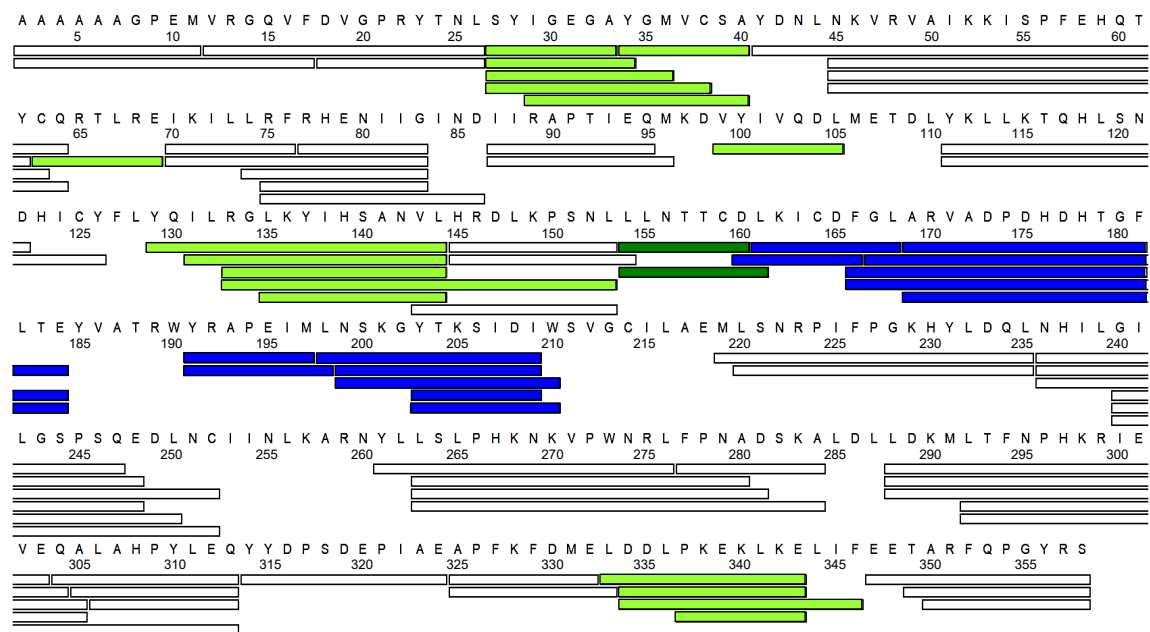

**Figure S2. Proteolytic peptides analyzed by HDX-MS.** Peptides produced by pepsin digestion yielded 90% and 91% coverage of exchangeable amides in **(A)** 0P-ERK2 and **(B)** 2P-ERK2, respectively. Colors indicate regions where ligand binding alters HDX uptake. Light green indicates peptides where binding of VTX11e, BVD523, and GDC0994 induce a similar degree of HDX protection (i.e., decreased deuterium uptake) in both 0P-ERK2 and 2P-ERK2. Deep green indicates peptides where all inhibitors induce a similar degree of HDX protection, but only in 2P-ERK2. Deep blue indicates peptides where VTX11e and BVD523 induce greater HDX protection compared to GDC0994 in 2P-ERK2. Light blue indicates peptides that show HDX protection by all inhibitors around the DFG motif in 0P-ERK2, but to a lower amount compared to BVD523 or VTX11e in 2P-ERK2.

**Figure S3**

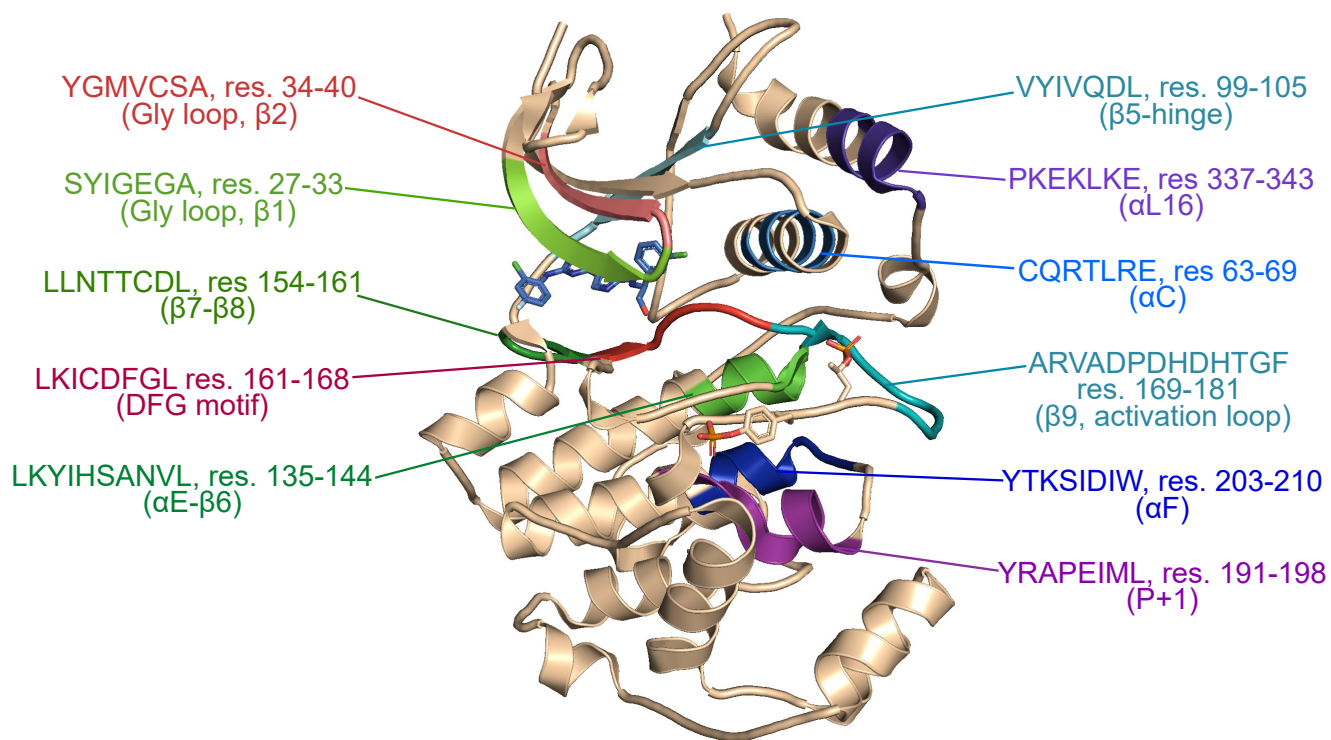

**Figure S3. Structural map of regions showing HDX responses to inhibitor binding.** Structure of 2P-ERK2 (PDBID:6OPK), indicating the locations of peptides where binding of VTX11e, BVD523 or GDC0994 alter HDX behavior, as highlighted in **Fig. S2**.



## Figure S4

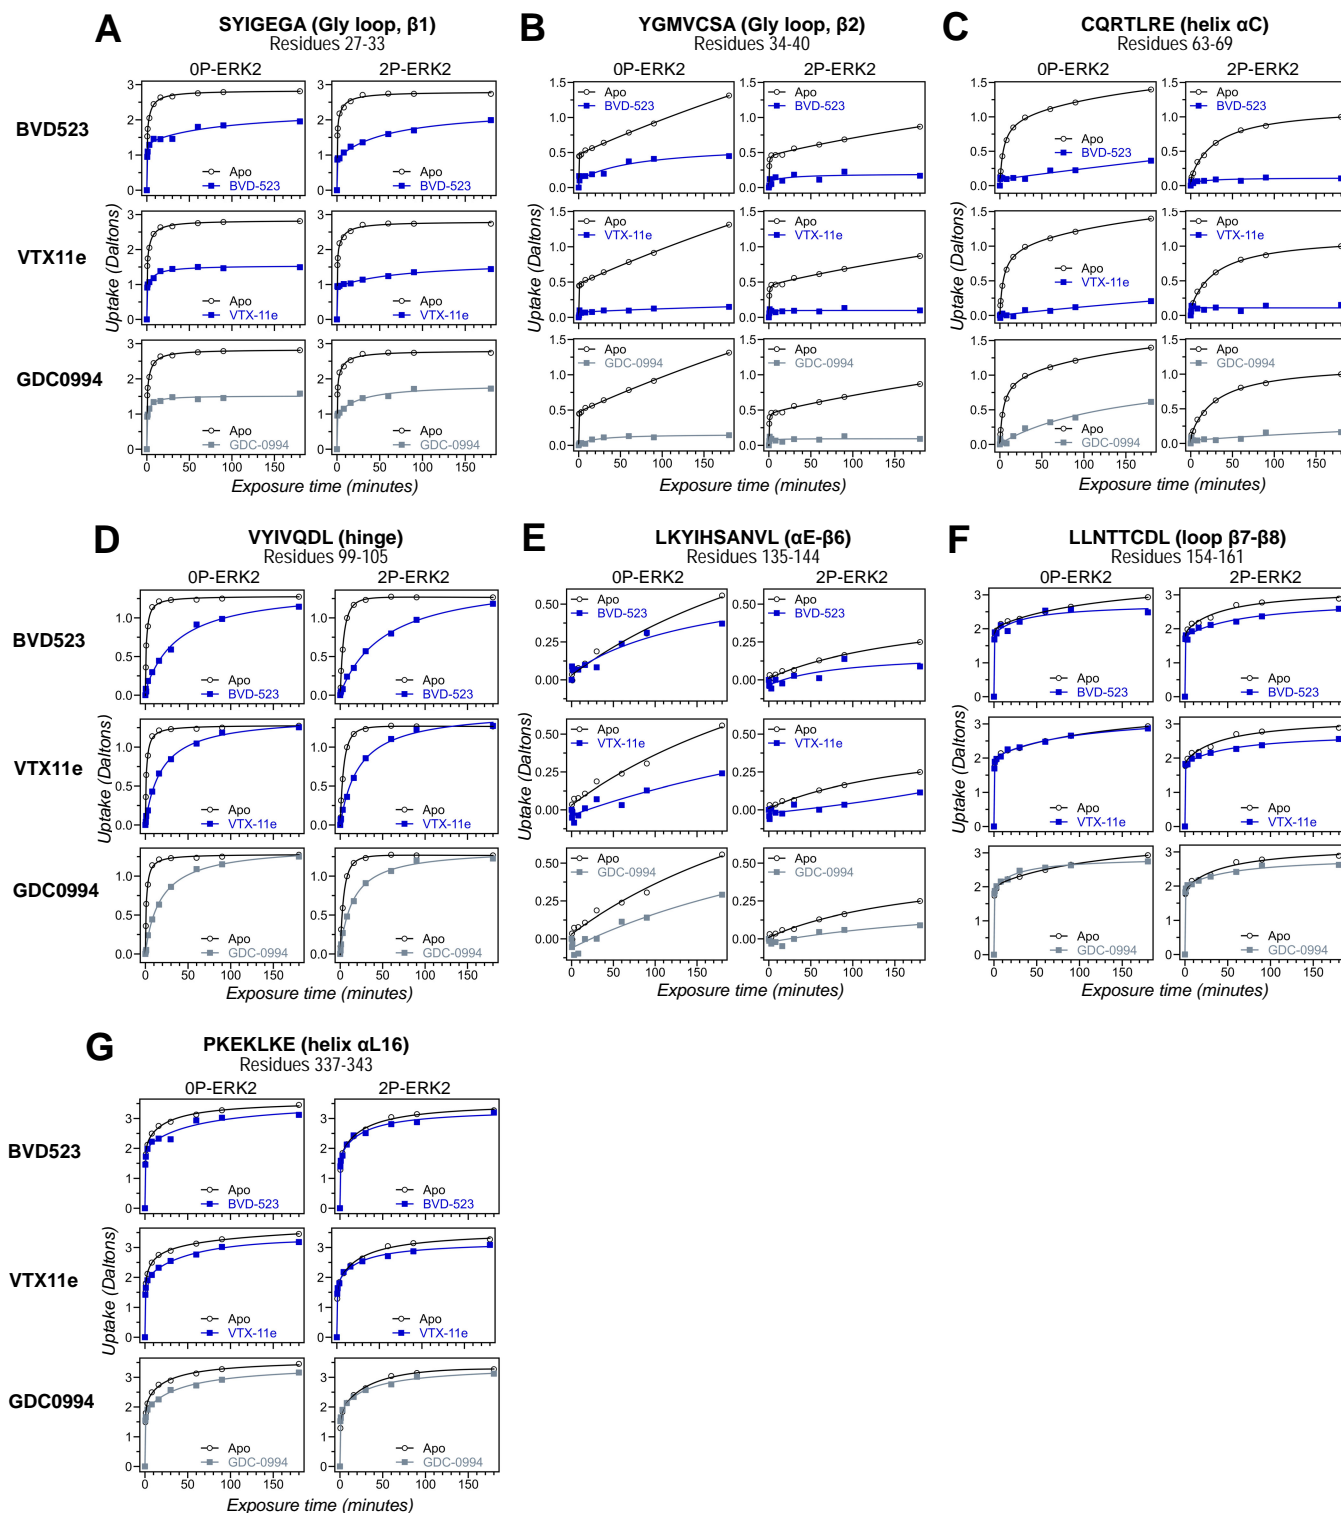

**Figure S4. HDX time courses of regions with comparable responses to different inhibitors.** HDX time courses for key peptide segments in ERK2, including (A,B) the Gly loop (peptide 29-33, SYIGEGA; peptide 34-40, YGMVCSA), (C) helix  $\alpha$ C (peptide 63-69, CQRTLRE), (D) the hinge (peptide 99-105, VYIVQDL), (E) helix  $\alpha$ E- $\beta$ 6 (peptide 135, 144, LKYIHSANVL), (F) loop  $\beta$ 7- $\beta$ 8 (peptide 154-161, LLNTTCDL), and (G) helix  $\alpha$ L16 (peptide 337-343, PKEKLKE). Open symbols show deuterium uptake in 0P- or 2P-ERK2 apoenzymes. Closed symbols show deuterium uptake in 0P- or 2P-ERK2 complexed with BVD523, VTX11e (blue) or GDC0994 (grey). In these regions, deuterium uptake decreases by a similar degree upon binding each of the three inhibitors.

Figure S5

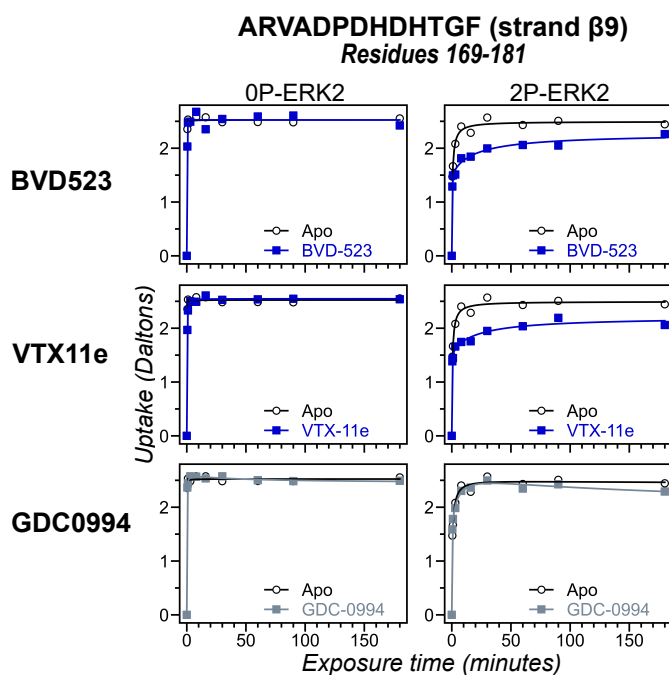

**Figure S5. HDX time courses with differential responses to inhibitor binding.**

HDX time courses for strand  $\beta$ 9 (peptide 169-181, ARVADPDHDTGF) located adjacent to the DFG motif. Open symbols show deuterium uptake in 0P- or 2P-ERK2 apoenzymes. Closed symbols show deuterium uptake in 0P- or 2P-ERK2 complexed with BVD523, VTX11e or GDC0994. Deuterium uptake in these regions decreases by a larger degree upon binding VTX11e or BVD523 (blue) compared to GDC0994 (grey), as seen in the DFG motif, P+1 and helix  $\alpha$ F (**Fig. 2**).

Figure S6A

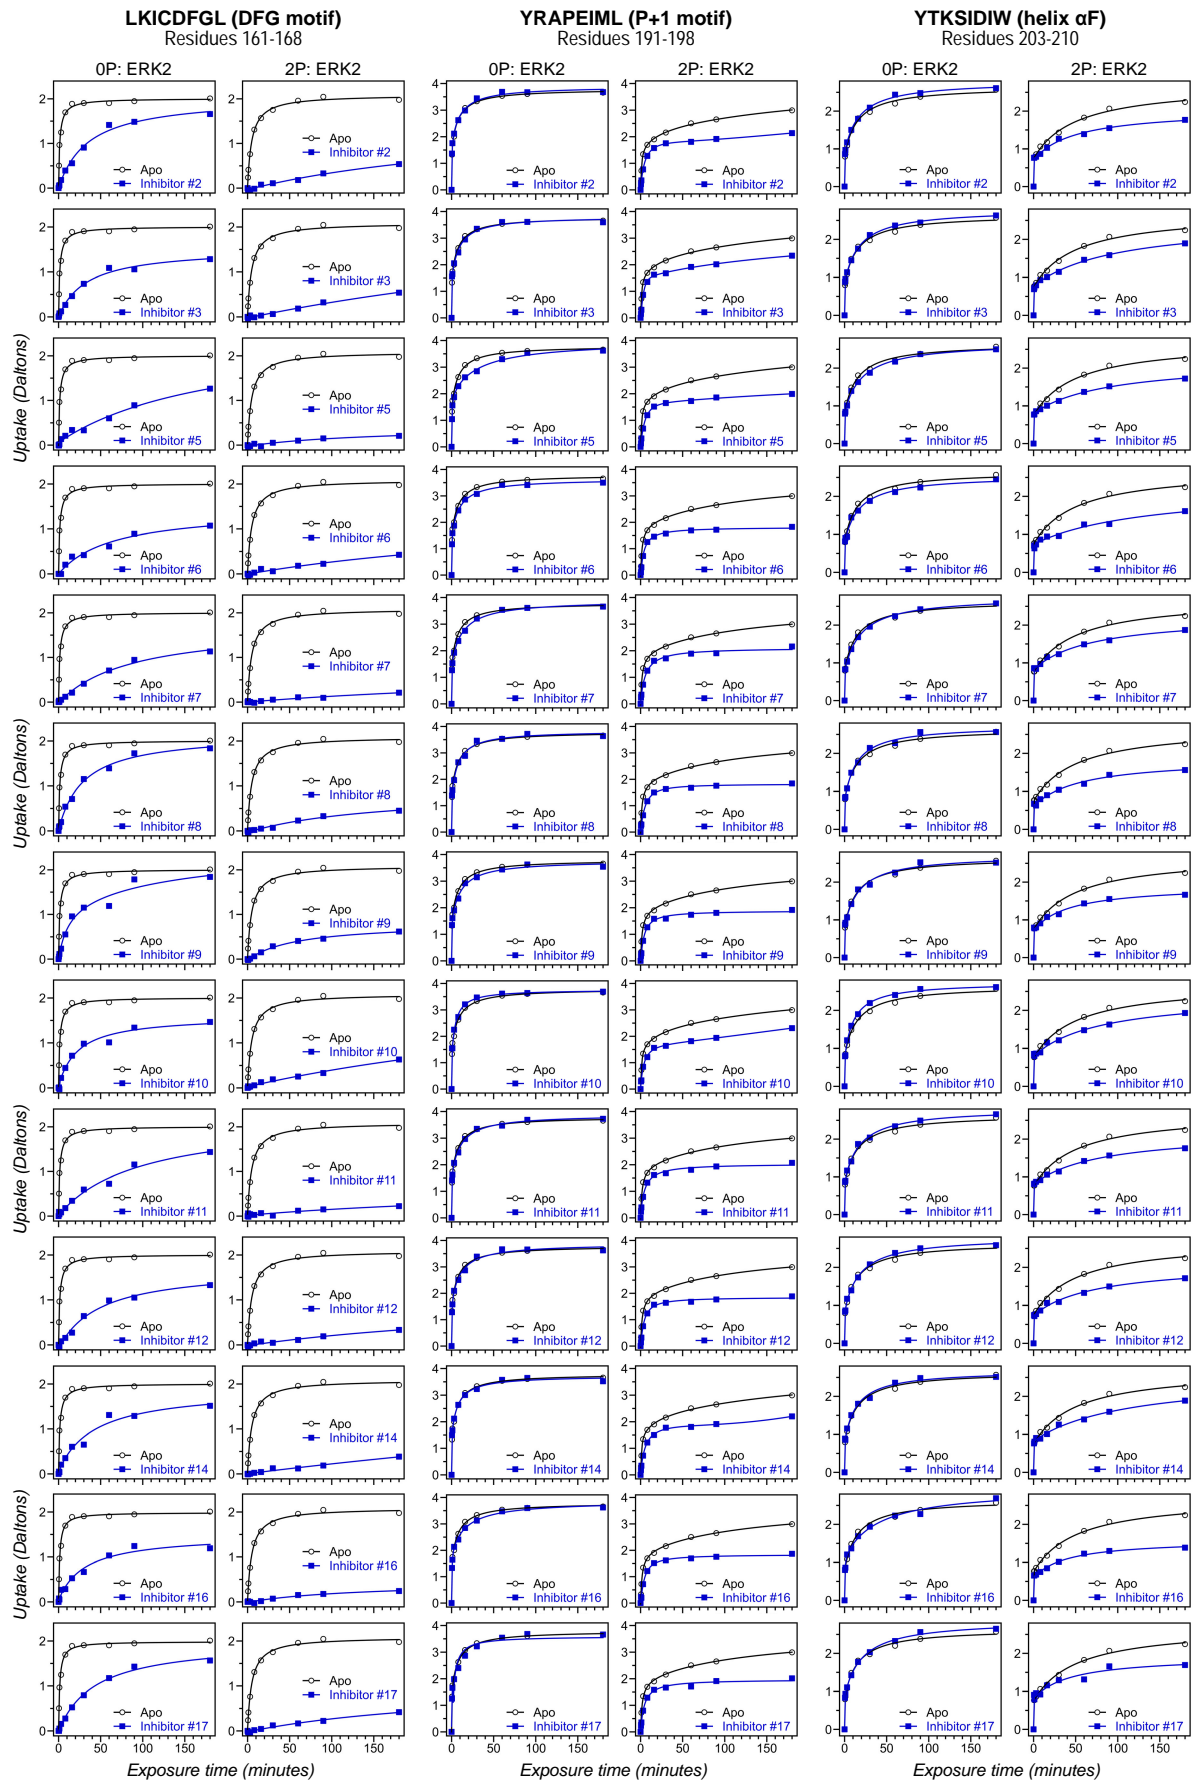

## Figure S6B

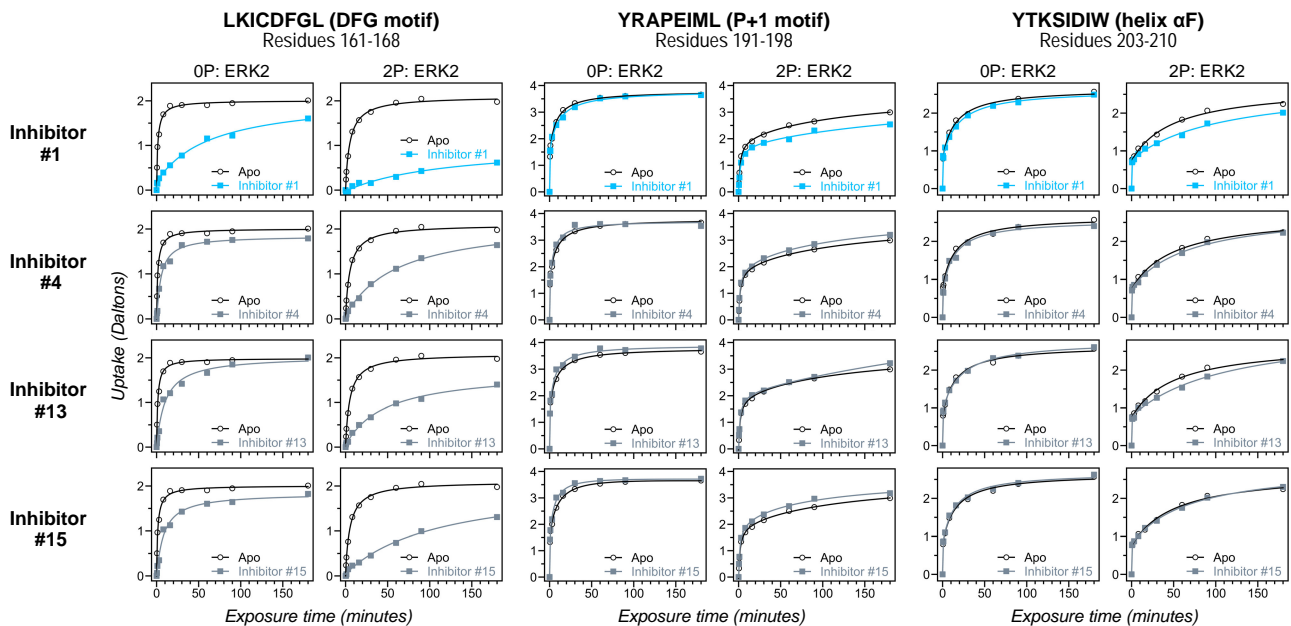

**Figure S6. Differential HDX responses to new inhibitors surveyed in this study.** Effects of binding the full set of inhibitors #1-#17 on deuterium uptake into the DFG motif (peptide 161-168: LKICDFGL), P+1 segment (peptide 191-198, YRAPEIML), and helix  $\alpha$ F (peptide 203-210: YTKSIDIW), expanding the selected subset in **Fig. 4**. Open symbols show deuterium uptake in 0P- or 2P-ERK2 apoenzymes. Closed symbols show deuterium uptake in 0P- or 2P-ERK2 complexed with inhibitors. **(A)** Thirteen inhibitors (#2, #3, #5-12, #14, #16 and #17; blue) show HDX uptake patterns for 2P-ERK2 that are similar to VTX11e and BVD523, suggesting conformation selection for the R-state. **(B)** Three inhibitors (#4, #13, #15; grey) show HDX patterns similar to GDC0994, consistent with R $\rightleftharpoons$ L exchange. One inhibitor (#1; cyan) shows significant HDX protection in the DFG motif, but only marginal protection in the P+1 segment or helix  $\alpha$ F, suggesting behavior intermediate between VTX11e/BVD523 and GDC0994.



Figure S7

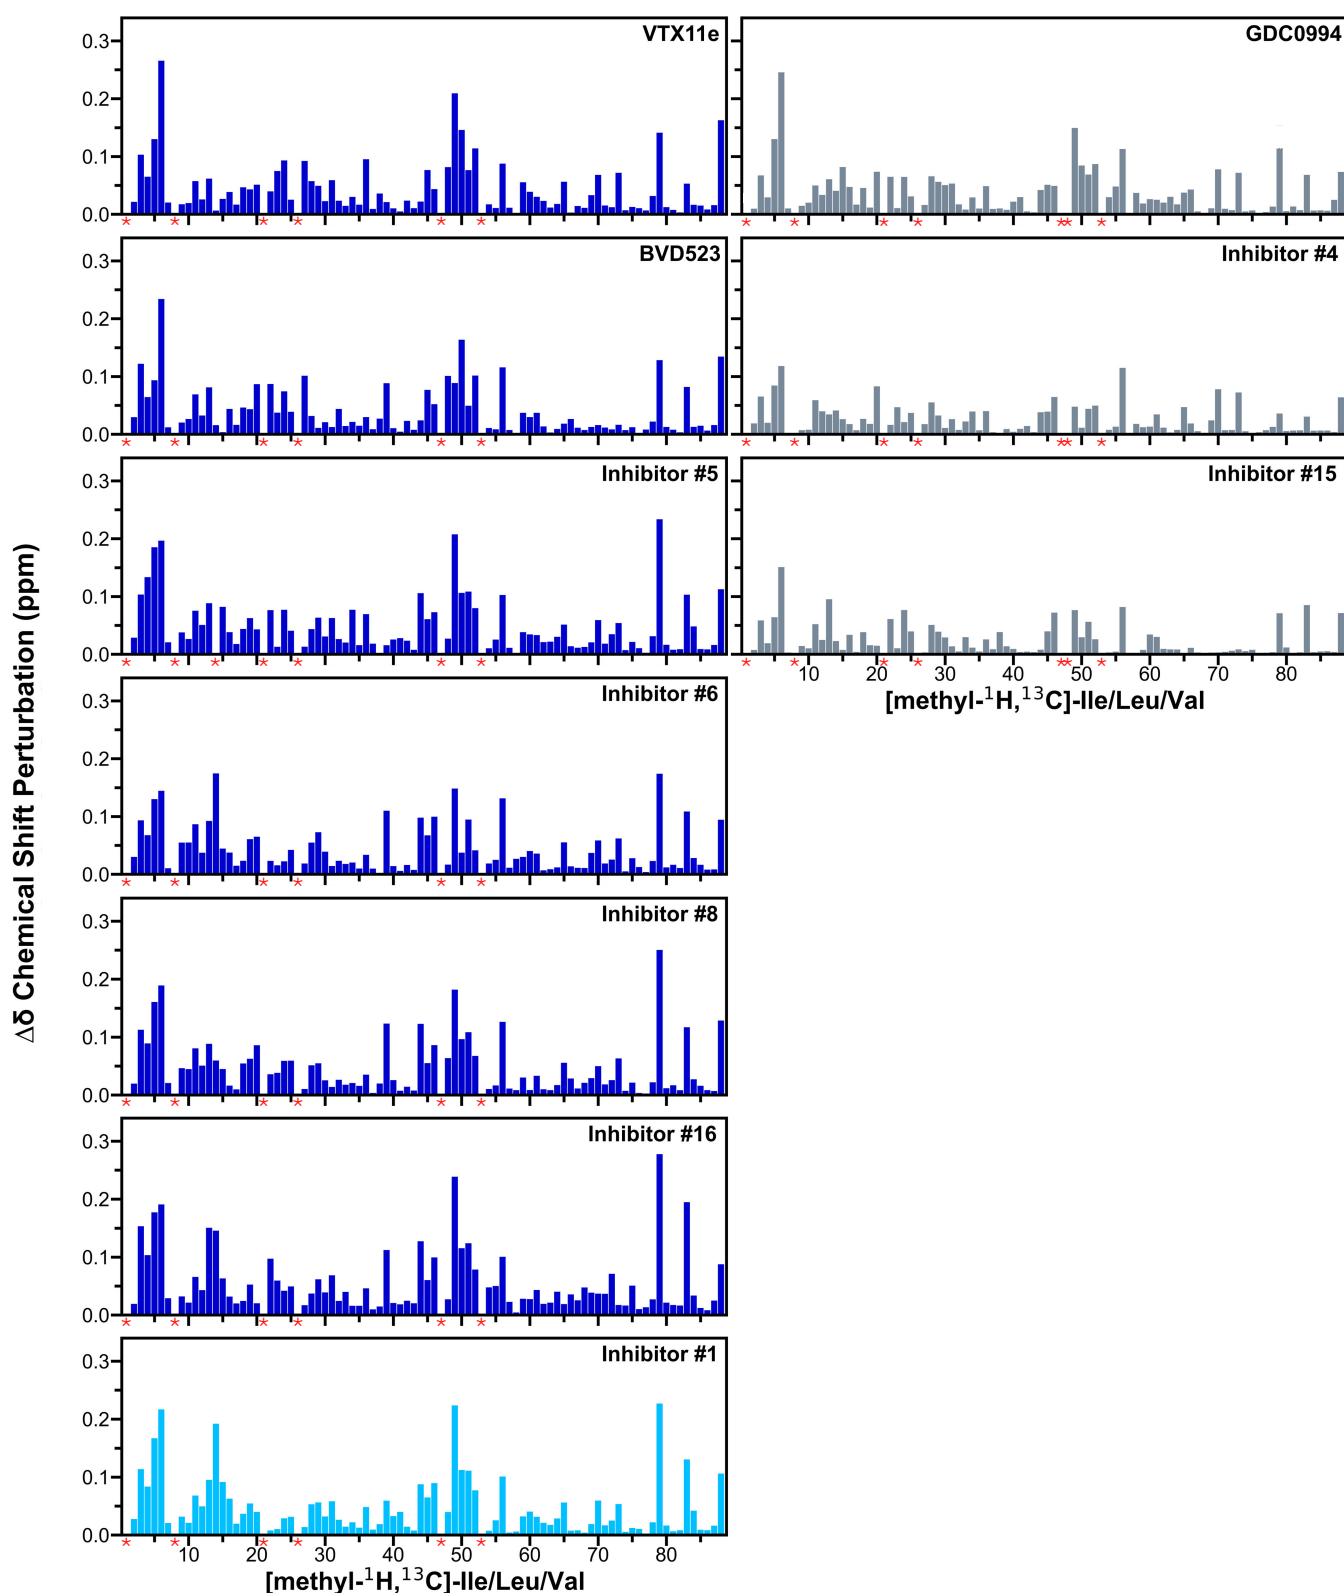

**Figure S7. Chemical shift changes induced by inhibitor binding to 2P-ERK2.** 2D-HMQC spectra collected on [methyl  $^1\text{H}$ ,  $^{13}\text{C}$ ]-ILV labeled 2P-ERK2 complexed with VTX11e, BVD523, GDC0994, and the selected subset of seven inhibitors in **Fig. 6**. Chemical shift perturbations (CSP) were calculated by the equation:  $\Delta\delta$  (ppm) =  $\text{SQRT}[(\delta_{\text{H}}^2 + 0.20(\delta_{\text{C}}^2)]$ , and plotted for each ILV residue methyl. Red asterisks below the x-axes indicate methyl peaks that could not be traced in the ligand-bound state, ascribed to peak broadening. Numberings of methyl assignments, their chemical shifts and CSP calculations are listed in **Suppl. Dataset S2**.

## Figure S8

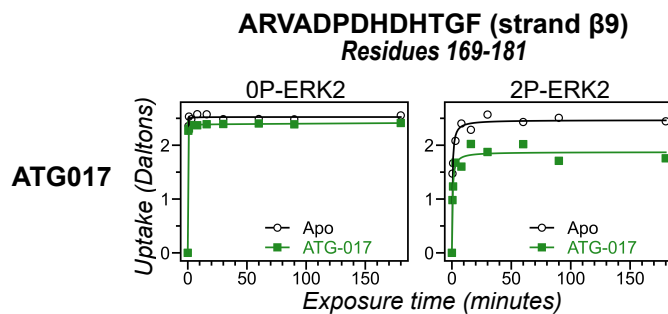

**Figure S8. HDX time courses responsive to ATG017 binding.** HDX time courses for strand  $\beta$ 9 (peptide 169-181, ARVADPDHDHTGF). Open symbols show deuterium uptake in 0P- or 2P-ERK2 apoenzymes. Closed symbols show deuterium uptake in 0P- or 2P-ERK2 complexed with ATG017 (green). ATG017 decreases HDX uptake into strand  $\beta$ 9 to a larger degree compared to GDC0994, similar to the behavior of the DFG motif, P+1 and helix  $\alpha$ F (**Fig. 9D**).

Figure S9

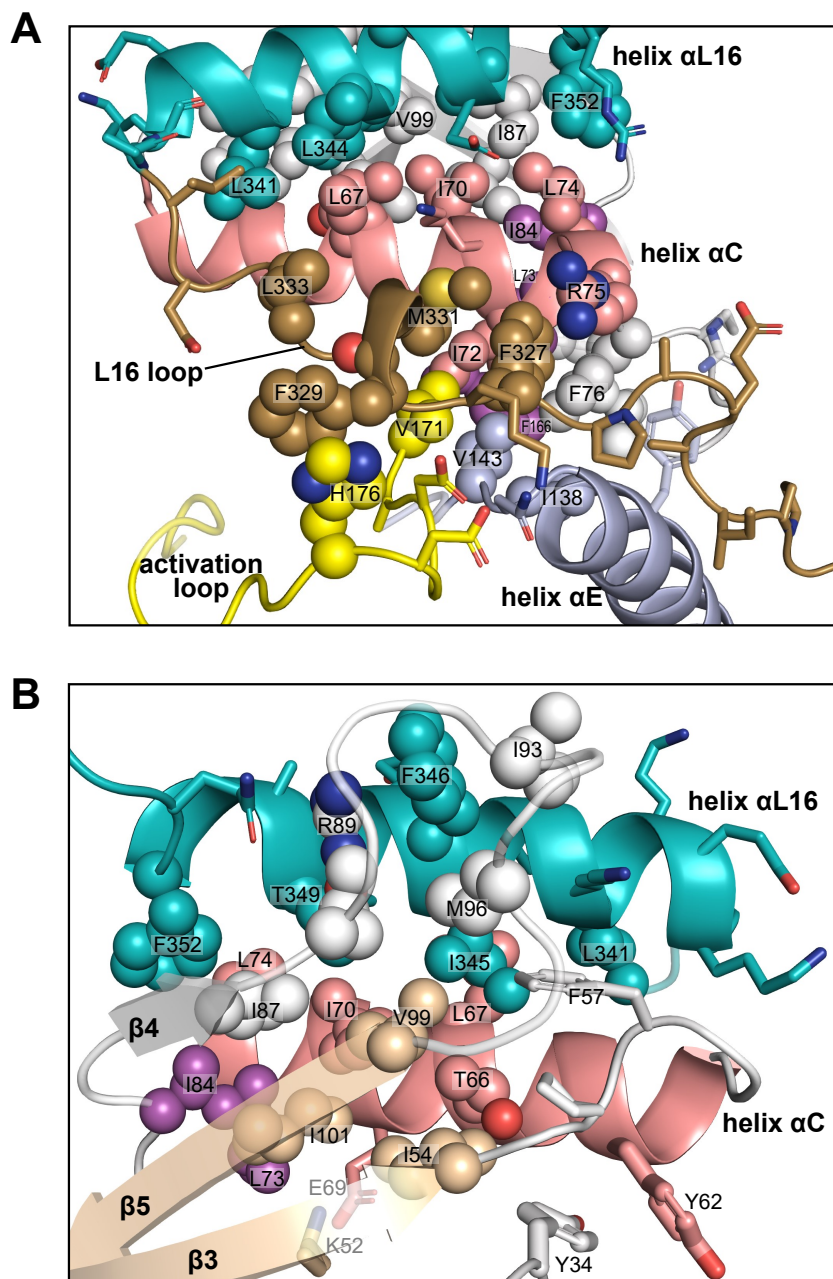

**Figure S9. Interactions of L16 and helix  $\alpha$ L16 with N-lobe elements.** Views of 2P-ERK2 (PDBID:2ERK), showing hydrophobic residue interactions between (A) loop L16 (F327) and helices  $\alpha$ C and  $\alpha$ E (I72, R75, F76, I138). Residues in helix  $\alpha$ C in turn form second sphere interactions with residues nearby catalytic residues in  $\beta$ 3 (I54, nearby K52),  $\beta$ 3- $\beta$ 9 (F166, DFG motif), and  $\beta$ 6 (V143, nearby HRD). (B) Residue interactions showing close connections between helix  $\alpha$ L16 (I345, F346, T349, F352), and helix  $\alpha$ C (I54, F57, T66, I67, I70, L74, I87, V99) and loop  $\beta$ 4- $\beta$ 5 (R89, M96, V99). Residues in magenta (L73, I84, F166) participate in the R-spine in ERK2.



**Figure S10**

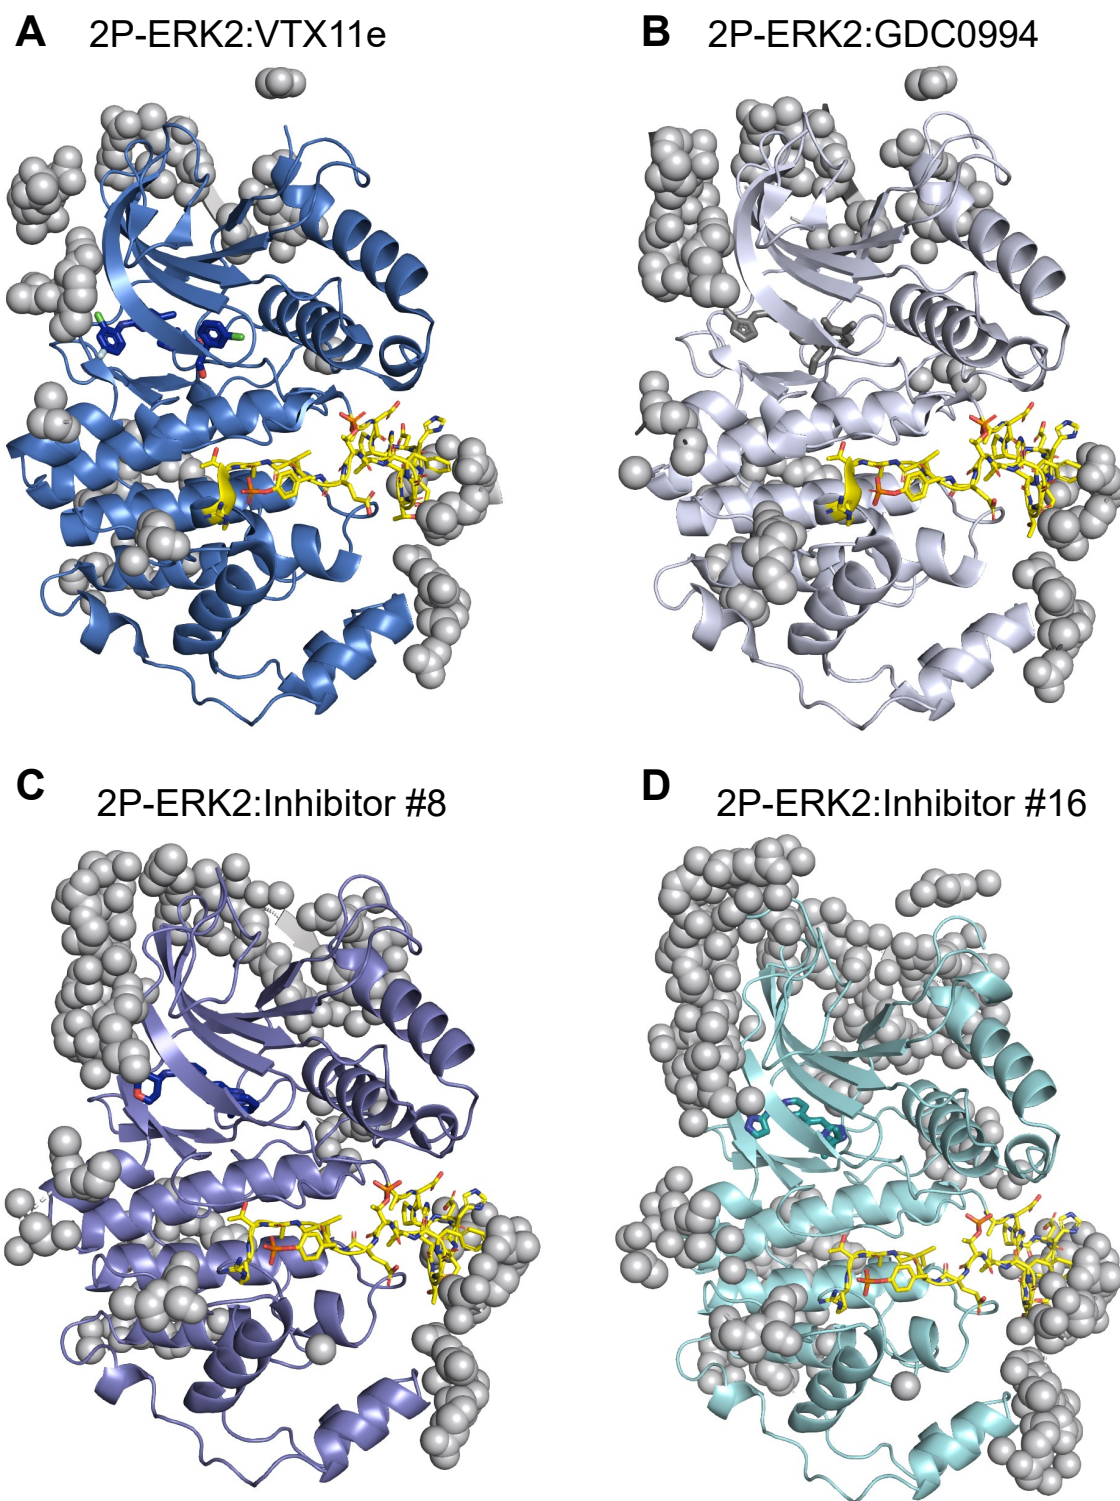

**Figure S10. Crystal contacts with the activation loop in X-ray structures of ERK2.** Structures of (A) 2P-ERK2:VTX11e (PDBID:6OPK), (B) 2P-ERK2:GDC0994 (PDBID:6OPH), (C) 2P-ERK2:Inhibitor#8, and (D) 2P-ERK2:Inhibitor#16 (Suppl. Datasets S3, S4). The activation loop is rendered in yellow, and atoms to the asymmetric unit from protein neighbors within 5 Å are shown as grey spheres.



**SUPPLEMENTAL TABLE**

**Table S1. X-ray data collection and refinement parameters**

|                                           | <b>2P-ERK2:Inhibitor #8</b>                   | <b>2P-ERK2:Inhibitor #16</b>                  |
|-------------------------------------------|-----------------------------------------------|-----------------------------------------------|
| <b>PDB code</b>                           | TBD                                           | TBD                                           |
| <b>Data Collection:</b>                   |                                               |                                               |
| Space group                               | P2 <sub>1</sub> 2 <sub>1</sub> 2 <sub>1</sub> | P2 <sub>1</sub> 2 <sub>1</sub> 2 <sub>1</sub> |
| Unit cell parameters (Å, °)               | a = 41.98, b = 77.28,<br>c = 151.54, β = 90.0 | a = 42.10, b = 76.66,<br>c = 151.97, β = 90.0 |
| Resolution range (Å)                      | 21.73 – 2.10<br>2.15 – 2.10                   | 23.82 – 2.10<br>2.15 – 2.10                   |
| Number of reflections                     | 27,964                                        | 24,273                                        |
| Completeness (%)                          | 100                                           | 100                                           |
|                                           |                                               |                                               |
| <b>Refinement:</b>                        |                                               |                                               |
| R <sub>work</sub> /R <sub>free</sub>      | 0.197/0.228                                   | 0.187/0.228                                   |
| Total residues                            | 556                                           | 682                                           |
| Total non-hydrogen atoms                  | 3,094                                         | 3,229                                         |
| Number of protein atoms                   | 2,858                                         | 2,873                                         |
| Number of water molecules                 | 206                                           | 329                                           |
| Number of heteroatoms                     | 30                                            | 27                                            |
| RMSD bond lengths (Å)                     | 0.010                                         | 0.009                                         |
| RMSD angles (°)                           | 1.17                                          | 1.16                                          |
| Cruickshank DPI (Å)                       | 0.18                                          | 0.21                                          |
|                                           |                                               |                                               |
| <b>Average B factors (Å<sup>2</sup>):</b> |                                               |                                               |
| Average B, overall                        | 31.23                                         | 32.56                                         |
| Protein                                   | 30.88                                         | 31.61                                         |
| Waters                                    | 36.70                                         | 41.29                                         |
| Ligand                                    | 27.17                                         | 26.92                                         |
